# Supplementary material
Source: bioRxiv or medRxiv preprint supplement (https://www.biorxiv.org/highwire/filestream/93602/field_highwire_adjunct_files/0/261560-1.pdf)
Supplement: Supplementary file [file 261560-1.pdf]

## SUPPLEMENTAL MATERIAL

### Regulation of cyclic electron flow by chloroplast NADPH-dependent thioredoxin system

Lauri Nikkanen, Jouni Toivola, Andrea Trotta, Manuel Guinea Diaz, Mikko Tikkanen, Eva-Mari Aro and Eevi Rintamäki\*

Molecular Plant Biology, Department of Biochemistry, University of Turku, FI-20014 Turku, Finland

**Short title:** Redox-regulation of the thylakoid NDH complex

**\*Corresponding author:**

Eevi Rintamäki

[evirin@utu.fi](mailto:evirin@utu.fi)

Molecular Plant Biology

Department of Biochemistry

University of Turku

FI-20014 TURKU

Finland

+358504309491

**A**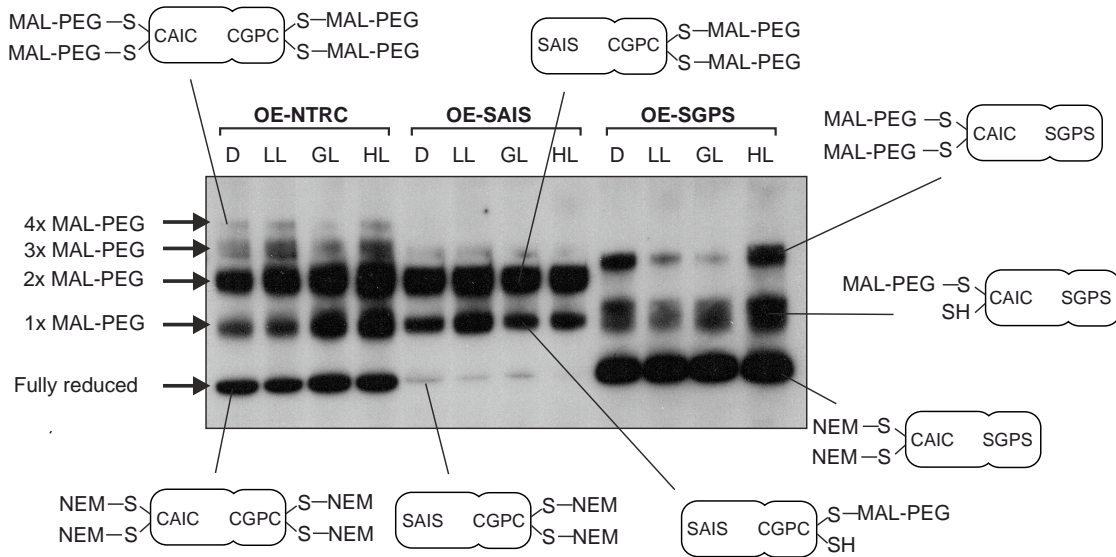**B**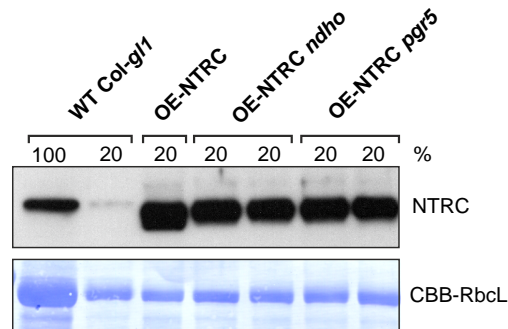

**Supplemental Figure S1.** Redox state and expression of NTRC in transgenic lines.

**(A)** Redox-state pattern of NTRC in leaves overexpressing NTRC. Total leaf proteins were extracted from leaves overexpressing NTRC (OE-NTRC) and from lines overexpressing mutated forms of NTRC where the redox-active cysteines in either the reductase domain (OE-SAIS) or in the TRX domain (OE-SGPS) have been mutated to serines (Toivola et al. 2013). In the mutated forms only 2 cysteine residues are available for alkylation by MAL-PEG molecules. The schematic drawings depict possible locations of MAL-PEG binding in specific bands. Leaves were incubated in darkness (D), or illuminated for 2 h in low light (LL, 40  $\mu\text{mol photons m}^{-2} \text{s}^{-1}$ ), growth light (GL, 200  $\mu\text{mol photons m}^{-2} \text{s}^{-1}$ ) or high light (HL, 800  $\mu\text{mol photons m}^{-2} \text{s}^{-1}$ ).

**(B)** Level of NTRC overexpression in OE-NTRC *ndho* and OE-NTRC *pgr5* plants detected by immunoblotting with an NTRC-specific antibody. 10 and 2  $\mu\text{g}$  of soluble protein was loaded for WT and 2  $\mu\text{g}$  for OE-NTRC, OE-NTRC *ndho* and OE-NTRC *pgr5*. Two individual plants were sampled for OE-NTRC *ndho* and OE-NTRC *pgr5*. Coomassie brilliant blue (CBB) staining was used as loading control.

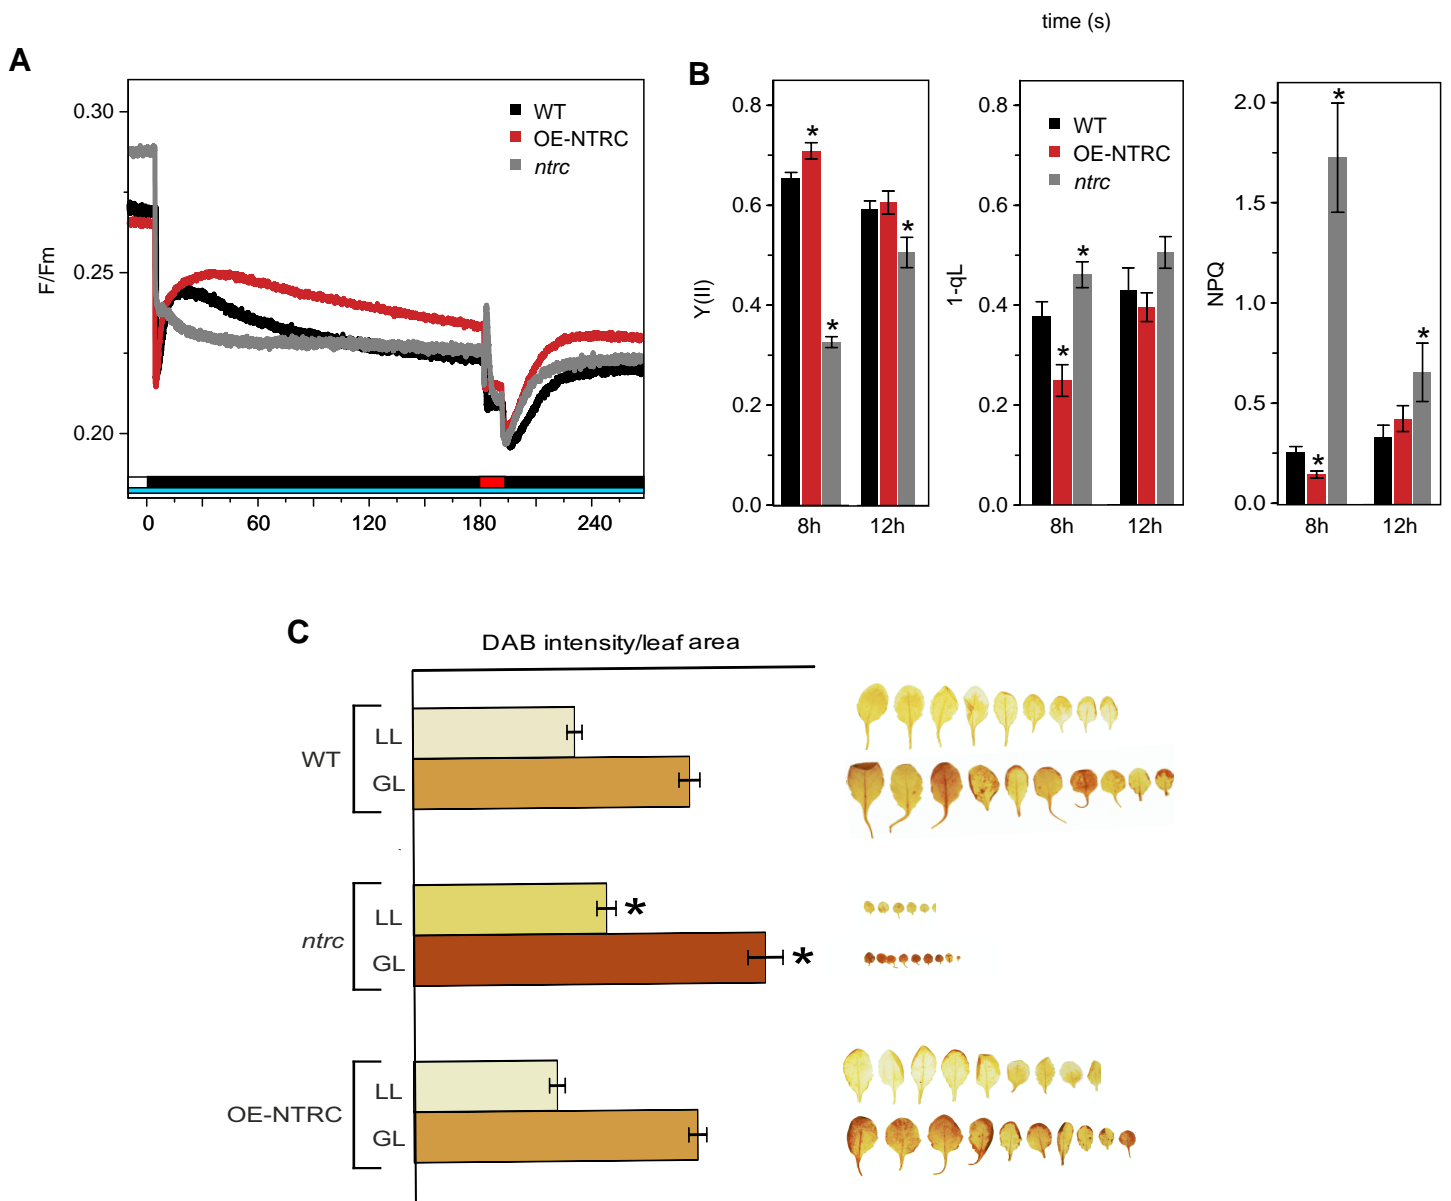

**Supplemental Figure S2.** Post-illumination fluorescence rise (PIFR) in plants grown in a 12h/12h photoperiod.

**(A)** PIFR in dark-adapted WT, OE-NTRC and *ntrc* plants grown in a 12h/12h photoperiod under 120  $\mu\text{mol photons m}^{-2} \text{s}^{-1}$ . The cyan bar indicates exposure to a 480 nm measuring light of 0.28  $\mu\text{mol photons m}^{-2} \text{s}^{-1}$ , the white bar depicts illumination with 67  $\mu\text{mol photons m}^{-2} \text{s}^{-1}$  white light and the red bar shows the duration of a pulse of far red light. The curves are averages of measurements from 3–4 individual leaves.

**(B)** Quantum yield of PSII (Y(II)), redox state of the PQ pool (1-qL) and non-photochemical quenching (NPQ) at Fm' (after 7 min illumination) in plants grown either in an 8h or 12h photoperiod. The values are averages of 3–10 measurements  $\pm$ SE, and statistically significant differences to WT according to Student's T-tests ( $P < 0.05$ ) are marked with \*.

**(C)** Estimation of  $\text{H}_2\text{O}_2$  content in WT, *ntrc* and OE-NTRC leaves after 1h illumination in low (LL) or growth light intensity (GL) based on the intensity of DAB staining. Values are represented as weighted (based on leaf area) averages of quantified DAB intensity from 12–19 individual leaves from 2 biological replicates  $\pm$ SE, and statistically significant differences to WT according to Student's T-tests ( $P < 0.05$ ) are marked with \*. Representative photographs of DAB-stained leaves are shown on the right.

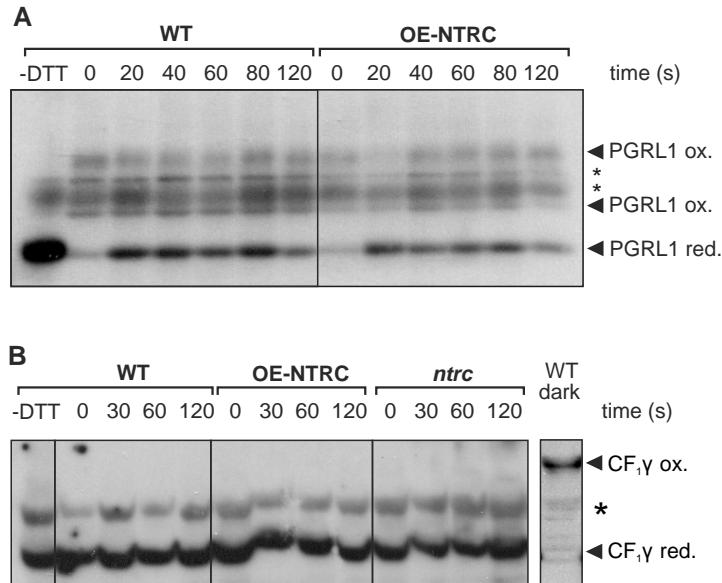

**Supplemental Figure S3.** *In vivo* redox states of PGRL1 and CF<sub>1</sub>γ during changes in light conditions.

**(A)** MAL-PEG assay to determine the *in vivo* redox state of PGRL1 during dark to light transitions. Samples were collected after illumination of dark-adapted leaves for 20, 40, 60, 80 and 120 seconds under growth light. -DTT is a control sample where free thiols were blocked with NEM but DTT was not added thereafter, preventing any alkylation by MAL-PEG.

**(B)** *In vivo* redox state of the ATP synthase  $\gamma$  subunit (CF<sub>1</sub>γ) during transitions from low light (40  $\mu\text{mol photons m}^{-2} \text{s}^{-1}$ ) to high light (600  $\mu\text{mol photons m}^{-2} \text{s}^{-1}$ ) in WT, OE-NTRC and *ntrc* leaves. Prior to the light intensity shift plants grown under 200  $\mu\text{mol photons l m}^{-2} \text{s}^{-1}$  were kept 30 min under low irradiance. Samples were taken after illumination for 0, 30, 60 and 120 seconds in high light. A dark-incubated control (WT dark) is seen in the right panel.\* marks unspecific bands.

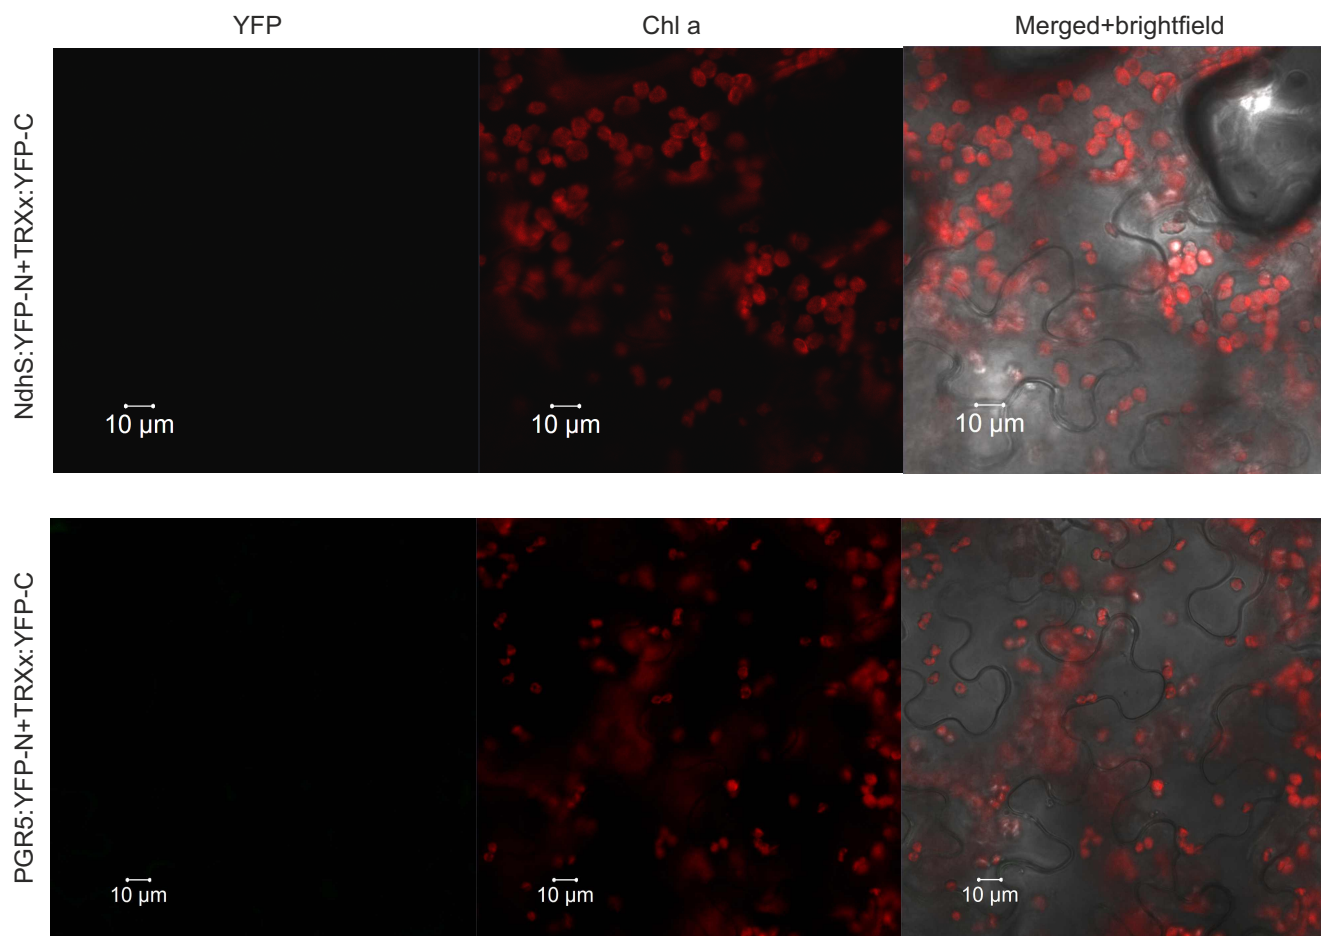

**Supplemental Figure S4.** Bimolecular fluorescence complementation (BiFC) tests between TRX-x and NdhS and PGR5.

The left panel shows yellow fluorescent protein (YFP) fluorescence in green, the middle panel Chlorophyll a autofluorescence in red and the right panel a merged image of YFP, chlorophyll and brightfield images. YFP-N and YFP-C indicate expression of fusion proteins including the N-terminal and C-terminal parts of YFP, respectively, in tobacco (*Nicotiana benthamiana*) leaves.

**Supplemental Table S1.** Parameters determined from OJIP transients of chlorophyll a fluorescence.

Apparent  $F_0$  values ( $F/F_m$  after 20  $\mu$ s of light), integrated area above O-J phase (0-3 ms) ( $A_{O-J}$ ) and the initial slopes of the O-J transients ( $m_{50-150 \mu s}$ ) in dark-adapted leaves of WT, OE-NTRC, *ntrc*, *pgr5* and *ndho* were calculated from the averaged curves in Figure 3.

| <b>line</b> | <b><math>F_0</math> (<math>F_{20\mu s}</math>)</b> | <b><math>A_{O-J}</math></b> | <b><math>m_{50-150 \mu s}</math></b> |
|-------------|----------------------------------------------------|-----------------------------|--------------------------------------|
| WT          | 0.18                                               | 1.62                        | 0.58                                 |
| OE-NTRC     | 0.21                                               | 1.46                        | 0.74                                 |
| <i>ntrc</i> | 0.26                                               | 1.29                        | 1.20                                 |
| <i>pgr5</i> | 0.21                                               | 1.84                        | 0.47                                 |
| <i>ndho</i> | 0.17                                               | 1.76                        | 0.57                                 |

**Supplemental Table S2.** Screening of putative NTRC target proteins by Co-IP/MS.

One hundred chloroplast proteins present in WT and/or OE-NTRC eluates but absent from *ntrc* eluates are listed in this table in the order of their abundance in the Co-IP eluates (Supplemental Dataset 1). At least two unique peptides were detected of each protein. Previously published TRX targets are highlighted with blue (articles 3, 5, 6, 7, 8, and 9 in Suppl. references) and established NTRC interactors with red colour (articles 1, 2, 4, 10, and 11 in Suppl. references), while proteins involved in CEF are in bold. Functions of the proteins are provided based on the annotation in the TAIR database.

| #  | AGI code    | Annotation                                                            | <i>ntrc</i> | WT | OE-NTRC | Function                           |
|----|-------------|-----------------------------------------------------------------------|-------------|----|---------|------------------------------------|
| 1  | ATCG01110.1 | NAD(P)H dehydrogenase subunit H                                       | -           | +  | +       | <b>Cyclic electron flow</b>        |
| 2  | AT1G15980.1 | NDH-dependent cyclic electron flow 1 (Ndh48)                          | -           | +  | +       | <b>Cyclic electron flow</b>        |
| 3  | AT3G11630.1 | 2-Cysteine peroxiredoxin A/B <sup>(1)</sup>                           | -           | +  | +       | Redox regulation                   |
| 4  | AT4G25080.4 | magnesium-protoporphyrin IX methyltransferase <sup>(2)</sup>          | -           | +  | +       | Chl biosynthesis                   |
| 5  | AT5G43780.1 | sulfate adenyltransferase, ATP sulfurylase (APS4, ATPS4)              | -           | +  | +       | Sulfate assimilation, AA synthesis |
| 6  | AT3G27925.1 | DegP protease 1 <sup>(3)</sup>                                        | -           | +  | +       | proteolysis                        |
| 7  | AT2G42220.1 | Rhodanese/Cell cycle control phosphatase superfamily protein          | -           | +  | +       | Cell cycle                         |
| 8  | AT2G40100.1 | LHCb4.3, LIGHT HARVESTING COMPLEX PHOTOSYSTEM II                      | -           | +  | +       | Photosynthesis                     |
| 9  | ATCG01120.1 | chloroplast ribosomal protein S15                                     | -           | +  | +       | Translation                        |
| 10 | AT4G17090.1 | chloroplast beta-amylase <sup>(4)</sup>                               | -           | +  | +       | Starch degradation                 |
| 11 | AT1G69830.1 | alpha-amylase-like 3 <sup>(5)</sup>                                   | -           | +  | +       | Starch degradation                 |
| 12 | AT5G53580.1 | ATPLR1, PLR1, PYRIDOXAL REDUCTASE 1                                   | -           | +  | +       | Carbon metabolism                  |
| 13 | AT5G03880.1 | Thioredoxin family protein                                            | -           | +  | +       | Redox regulation                   |
| 14 | AT3G55610.1 | delta 1-pyrroline-5-carboxylate synthase 2                            | -           | +  | +       | AA biosynthesis                    |
| 15 | AT1G70820.1 | phosphoglucomutase, putative                                          | -           | +  | +       | Carbon metabolism                  |
| 16 | AT4G22710.1 | cytochrome P450, family 706, subfamily A, polypeptide 2               | -           | +  | +       | Secondary metabolism               |
| 17 | AT3G54110.1 | plant uncoupling mitochondrial protein 1                              | -           | +  | +       | Photorespiration                   |
| 18 | AT4G05180.1 | photosystem II subunit Q-2                                            | -           | +  | +       | Photosynthesis                     |
| 19 | AT2G04842.1 | threonyl-tRNA synthetase, putative / threonine--tRNA ligase, putative | -           | +  | +       | Translation                        |
| 20 | AT5G37510.1 | NADH-ubiquinone dehydrogenase, mitochondrial, putative                | -           | +  | +       | Mt respiration                     |
| 21 | AT5G65220.1 | Ribosomal L29 family protein                                          | -           | +  | +       | Translation                        |
| 22 | AT4G29670.1 | ACHT2, ATYPICAL CYS HIS RICH THIOREDOXIN 2                            | -           | +  | +       | Redox regulation                   |
| 23 | AT4G23650.1 | CALCIUM-DEPENDENT PROTEIN KINASE 6, CDPK6, CPK3                       | -           | +  | +       | Photosynthesis                     |
| 24 | AT1G58290.1 | Glutamyl-tRNA reductase family protein; GLUTR, HEMA1 <sup>(2)</sup>   | -           | +  | +       | Chl biosynthesis                   |
| 25 | AT1G58080.1 | ATP phosphoribosyl transferase 1                                      | -           | +  | +       | AA biosynthesis                    |
| 26 | AT3G24430.1 | HCF101                                                                | -           | +  | +       | Photosynthesis                     |
| 27 | AT2G32730.1 | 26S proteasome regulatory complex, Rpn2/Psm1 subunit                  | -           | +  | +       | Proteolysis                        |
| 28 | AT5G11880.1 | Pyridoxal-dependent decarboxylase family protein                      | -           | +  | +       | aa synthesis                       |
| 29 | AT1G63970.2 | 2C-METHYL-D-ERYTHRITOL 2,4-CYCLODIPHOSPHATE SYNTHASE, MECPS           | -           | +  | +       | Carbon & secondary metabolism      |
| 30 | AT5G40950.1 | ribosomal protein large subunit 27                                    | -           | +  | +       | Translation                        |
| 31 | AT5G03290.1 | isocitrate dehydrogenase V, IDH-V                                     | -           | +  | +       | Carbon metabolism                  |
| 32 | AT5G65840.1 | Thioredoxin superfamily protein                                       | -           | +  | +       | Redox regulation                   |
| 33 | AT4G23890.1 | <b>CHLORORESPIRATORY REDUCTION 31, CRR31, NdhS</b>                    | -           | +  | +       | <b>Cyclic electron flow</b>        |
| 34 | ATCG00330.1 | chloroplast ribosomal protein S14                                     | -           | +  | +       | Translation                        |
| 35 | AT1G34000.1 | OHP2, ONE-HELIX PROTEIN 2                                             | -           | +  | +       | Photosynthesis                     |
| 36 | AT1G18500.1 | IPMS1, ISOPROPYLMALATE SYNTHASE 1, MAML-4,                            | -           | +  | +       | AA synthesis                       |
| 37 | AT2G28800.4 | ALB3, ALBINO 3                                                        | -           | +  | +       | Cplast biogenesis & senescence     |
| 38 | AT5G08540.1 | unknown protein                                                       | -           | +  | +       | Unknown                            |
| 39 | AT1G08520.1 | CHLD, ALB-1V, ALB1, ALBINA 1, PDE166                                  | -           | -  | +       | Chl biosynthesis                   |
| 40 | AT1G06680.2 | photosystem II subunit P-1                                            | -           | +  | +       | Photosynthesis                     |
| 41 | AT5G26830.1 | Threonyl-tRNA synthetase                                              | -           | +  | +       | Translation                        |
| 42 | AT4G15110.1 | cytochrome P450, family 97, subfamily B, polypeptide 3                | -           | +  | -       | Carbon metabolism                  |
| 43 | AT5G66420.1 | unknown protein                                                       | -           | +  | -       | Unknown                            |
| 44 | AT1G33780.1 | unknown protein                                                       | -           | +  | +       | Unknown                            |
| 45 | AT1G45201.2 | triacylglycerol lipase-like 1                                         | -           | +  | +       | Lipid metabolism                   |
| 46 | AT1G48350.1 | Ribosomal L18p/L5e family protein                                     | -           | +  | +       | Translation                        |
| 47 | AT1G09620.1 | leucine-tRNA ligase                                                   | -           | +  | +       | Translation                        |

|     |                    |                                                                         |   |   |   |                                         |
|-----|--------------------|-------------------------------------------------------------------------|---|---|---|-----------------------------------------|
| 48  | AT1G64190.1        | 6-PHOSPHOGLUCONATE DEHYDROGENASE 1, PGD1 <sup>(6)</sup>                 | - | + | - | Carbon metabol.                         |
| 49  | AT5G14320.1        | Ribosomal protein S13/S18 family                                        | - | + | - | Translation                             |
| 50  | AT5G19940.2        | Plastid-lipid associated protein PAP / fibrillin family protein         | - | + | + | Lipid metabolism                        |
| 51  | AT1G50450.1        | Saccharopine dehydrogenase                                              | - | + | + |                                         |
| 52  | AT3G20680.1        | unknown protein                                                         | - | + | + | unknown                                 |
| 53  | AT1G77060.1        | Phosphoenolpyruvate carboxylase family protein                          | - | + | + | Carbon metabolism                       |
| 54  | AT5G27380.1        | glutathione synthetase 2, GSH2                                          | - | + | + | Redox regulation                        |
| 55  | AT1G51110.1        | Plastid-lipid associated protein PAP / fibrillin family protein         | - | + | + | AA biosynthesis                         |
| 56  | AT3G10940.1        | dual specificity protein phosphatase (DsPTP1) family protein            | - | + | + | Starch degradation                      |
| 57  | AT5G47890.1        | NADH-ubiquinone oxidoreductase B8 subunit, putative                     | - | + | + | Mitochondrial respiration               |
| 58  | AT1G10760.1        | GWD, GWD1, SEX1, SOP, SOP1, STARCH EXCESS 1 <sup>(7)</sup>              | - | + | - | Starch degradation                      |
| 59  | AT4G26900.1        | HIS HF, HISN4                                                           | - | + | + | AA synthesis                            |
| 60  | AT4G21280.1        | photosystem II subunit QA                                               | - | - | + | Photosynthesis                          |
| 61  | ATCG00820.1        | ribosomal protein S19                                                   | - | + | + | Translation                             |
| 62  | AT2G34460.1        | NAD(P)-binding Rossmann-fold superfamily protein                        | - | + | + | unknown                                 |
| 63  | AT1G56500.1        | SOQ1, SUPPRESSOR OF QUENCHING 1                                         | - | + | + | Redox regulation                        |
| 64  | AT5G54600.1        | PLASTID RIBOSOMAL PROTEIN L24, RPL24                                    | - | + | + | translation                             |
| 65  | AT2G21170.1        | triosephosphate isomerase, TPI <sup>(6)</sup>                           | - | + | - | Carbon metabolism                       |
| 66  | AT4G35630.1        | phosphoserine aminotransferase                                          | - | + | - | AA synthesis                            |
| 67  | AT4G31780.2        | monogalactosyl diacylglycerol synthase 1, MGD1, MGDA <sup>(8)</sup>     | - | + | - | Lipid metabolism                        |
| 68  | AT3G04870.1        | zeta-carotene desaturase, ZDS                                           | - | + | + | Carbon metabolism, secondary metabolism |
| 69  | AT5G14060.1        | lysine-sensitive aspartate kinase CARAB-AK-LYS                          | - | - | + | AA synthesis                            |
| 70  | AT1G80480.1        | plastid transcriptionally active 17                                     | - | - | + | unknown                                 |
| 71  | AT1G75460.1        | ATP-dependent protease La (LON) domain protein                          | - | - | + | Proteolysis                             |
| 72  | AT1G18060.1        | unknown protein                                                         | - | + | + | Unknown                                 |
| 73  | AT1G50200.2        | Alanyl-tRNA synthetase                                                  | - | + | + | Translation                             |
| 74  | AT2G30790.1        | photosystem II subunit P-2                                              | - | + | + | Photosynthesis                          |
| 75  | AT3G54210.1        | Ribosomal protein L17 family protein                                    | - | + | - | Translation                             |
| 76  | <b>AT3G01440.1</b> | <b>PsbQ-like 2</b>                                                      | - | + | - | <b>Cyclic electron flow</b>             |
| 77  | AT1G02560.1        | nuclear encoded CLP protease 5                                          | - | + | + | Proteolysis                             |
| 78  | AT2G15620.1        | nitrite reductase 1, NIR1 <sup>(9)</sup>                                | - | + | + | Nitrogen metabolism                     |
| 79  | AT5G18660.1        | PALE-GREEN AND CHLOROPHYLL B REDUCED 2, PCB2                            | - | + | + | Chl biosynthesis                        |
| 80  | AT3G59780.1        | Rhodanese/Cell cycle control phosphatase superfamily protein            | - | + | + | Cell cycle                              |
| 81  | <b>AT1G74880.1</b> | <b>NAD(P)H:plastoquinone dehydrogenase complex subunit O</b>            | - | + | + | <b>Cyclic electron flow</b>             |
| 82  | AT5G36170.2        | high chlorophyll fluorescent 109, HCF109                                | - | + | + |                                         |
| 83  | AT1G16880.1        | ACR11, ACT DOMAIN REPEATS 11                                            | - | + | + | AA metabolism                           |
| 84  | AT5G24300.1        | ATSS1, SS1, STARCH SYNTHASE 1 <sup>(10)</sup>                           | - | + | - | Starch synthesis                        |
| 85  | AT1G78140.1        | S-adenosyl-L-methionine-dependent methyltransferases superfamily        | - | + | - |                                         |
| 86  | AT4G25450.3        | non-intrinsic ABC protein 8                                             | - | + | - | unknown                                 |
| 87  | <b>AT5G21430.2</b> | <b>NADH dehydrogenase-like complex U, NdhU</b>                          | - | + | - | <b>Cyclic electron flow</b>             |
| 88  | AT1G16410.2        | BUS1, BUSHY 1, CYP79F1, CYTOCHROME P450 79F1, SPS1                      | - | + | - | Secondary metabolism                    |
| 89  | <b>AT2G05620.1</b> | <b>PROTON GRADIENT REGULATION 5, PGR5</b>                               | - | + | - | <b>Cyclic electron flow</b>             |
| 90  | AT3G06050.1        | peroxiredoxin IIF                                                       | - | + | + | Redox regulation                        |
| 91  | AT2G32920.1        | PDI-like 2-3, Protein disulfide-isomerase 2-3                           | - | + | + | Redox regulation                        |
| 92  | AT4G12830.1        | alpha/beta-Hydrolases superfamily protein                               | - | + | + | unknown                                 |
| 93  | AT3G55250.1        | Putative calcium homeostasis regulator                                  | - | - | + | Signalling                              |
| 94  | AT3G53900.1        | uracil phosphoribosyltransferase                                        | - | - | + |                                         |
| 95  | AT1G77490.1        | thylakoidal ascorbate peroxidase                                        | - | + | + | Redox regulation                        |
| 96  | AT5G11450.1        | PsbP domain-containing protein 5, PPD5                                  | - | - | + |                                         |
| 97  | AT4G34120.1        | Cystathionine beta-synthase (CBS) family protein, CBSX2 <sup>(11)</sup> | - | - | + | Redox regulation                        |
| 98  | AT1G31800.1        | LUTEIN DEFICIENT 5                                                      | - | + | + | Carotenoid biosynthesis                 |
| 99  | AT3G02780.1        | isopentenyl pyrophosphate:dimethylallyl pyrophosphate isomerase 2       | - | + | + | Chl biosynthesis                        |
| 100 | AT4G37200.1        | Thioredoxin superfamily protein HCF164                                  | - | + | + | Redox regulation                        |







Synechocystis ECYDELDWEVQYETAGDCFARYLVRIEMRESVKIIRQALKAMPGGPYENLEAKRLQEGK  
Physcomitrella ECYDELDWQIQWQKEGDSLARYLVRIEMKESIKIIQQALKSIPGGPYENLEARRLQRGK  
Sorghum ESYNQFDWKVQWQKEGDSLARYLVRVGEMRESIKIIQQAVEKIPGGPYENLEARRFKKAK  
Brachypodium ESYNQFDWKVQWQKEGDSLARYLVRIEMRESIKIIQQAVEKIPGGPYENLEVRRFKKEK  
Oryza ESYNQFDWKVQWQKEGDSLARYLVRIEMRESIKIIQQAVEKIPGGPYENLEVRRFKKAK  
Glycine ECYEFDWEVQWQKEGDSLARYLVRIEMMESIKIIQQALEGIPGGPYENLEIRCFDREK  
**Arabidopsis** **ESYDEFWEIQWQKQGDSLARYLVRLSEMTESIKIIQQALEGLPGGPYENLESRGFDRKR**  
Solanum ESYDEFDWQVQWQREGDSLARYLVRIEMTESIKIIQQALEGIPGGPYENLEMRRFDRLK  
Vitis ECYDEFDWEVQWQKEGDSLARYLVRIEMVASIKIIQQALEGIPGGPYENLEIRCFDRAR  
\*.\*::: \*::\*: \*\*.:\*\*\*\*\*: \*\* \*::\*:\*\*:: :\*\*\*\*\* : :.. :

Synechocystis KSEWPDFQYQYIAKKVAPTFKIPAGEHYVRLESKGKELGIFIQGNDDVFPWRWKIRSADF  
Physcomitrella KSEWNNFEYQFISKKPSPTFKLKPQEHYIRVEAPKGEIGVFLIGDDSVFPWRWKIRPPGF  
Sorghum NPEWPDFEYRFLGKKPSPNFELSKQELYVVEAPKGEIGIYLVGDDSLFPWRWKIRPPGF  
Brachypodium NSEWPDFEYRFLGKKPSPNFELSKQELYVRIEAPKGEIGIYLVGDDGLFPWRWKIRPPGF  
Oryza NSEWPDFEYRFLGKKPSPNFELSKQELYARVEAPKGEIGIYLVGDDSLFPWRWKIRPPGF  
Glycine EPEWNEFEYRFISKKPSPTFELPKQELYVRIEAPKGEIGIFLIGDQNGFPWRWKIRPPGF  
**Arabidopsis** **NPEWPDFEYRFISKKPSPTFELSKQELYVVEAPKGEIGIFLIGDQSGFPWRWKIRPPGF**  
Solanum DPEWPDFEYRFISKKPSPTFELSKQELYVVEAPKGEIGIFLIGDQSVFPWRWKIRPPGF  
Vitis DPELNDFEYRFISKKPSPTFELSKQELYVVEAPKGEIGIFLIGDQNVFPWRWKIRPPGF  
. \* \*::\*:\*\*.:\*\* \*.\*::: \* \* \*::\*: \*\*\*\*\*::: \*::. \*\*\*\*\* .\*

Synechocystis NNLQILPHILKGVKVADIMAILGSIDIIMGSVDR  
Physcomitrella INLQILPQLVKMKLADIMTILGSIDIIMGEVDR  
Sorghum INLQILPQLVKMKLADIMTILGSIDIIMGEVDR  
Brachypodium INLQILPQLVKMKLADIMTILGSIDIIMGEVDR  
Oryza INLQILPQLVKMKLADIMTILGSIDIIMGEVDR  
Glycine INLQILPQLVKRMKLADIMTILGSIDIIMGEVDR  
**Arabidopsis** **INLQILPELVKRMKLADIMTILGSIDIIMGEVDR**  
Solanum INLQILPQLVKRMKLADIMTILGSIDIIMGEVDR  
Vitis INLQILPQLVKRMKLADIMTILGSIDIIMGEVDR  
\*\*\*\*\*.:\* \*::\*:\*\*\*\*\*:\*\*\*\*\*.\*\*\*

**Supplemental Table S5.** Multiple alignment of Ndh48 (PNSB1) amino acid sequences in embryophytes. Sequences from *Physcomitrella patens* (PHYPADRAFT\_106212), *Oryza sativa* (Os08g0276100), *Brachypodium distachion* (BRADI\_3g19630), *Populus trichocarpa* (POPTR\_0001s03600g), *Arabidopsis thaliana* (AT1G15980) and *Glycine max* (GLYMA\_08G218800) were obtained and aligned as described in the legend for Supplemental table 2.

```

Physcomitrella MSAMAAQVVL-----GAGLANCPQCSICVTRATSSLSHNSPKLQLRAFGTRTNVRLNA
Oryza          MQTPTMSTSMATPAKLP---SPPS--LPIARQ-----CCCHL----LQLGRRG--G
Brachypodium  MQTPTMYTSMARATSA--AANLP--APPRQ-----CYYHL----LPPAGR--S
Populus       ----MASTLPLPKTISPFLTNPPP--LPSTHFTSKPSFFNPSADHH----LPCTRKP---
Arabidopsis   ---MASSLPLPKPISPFFKTPPF--STSKPLV-----FL---NFQ---TRLTSRSSDV
Glycine       MAATYYLLPTSPKTFSPFLRNPPS--IPSGHHVSLGSL---DYP----FHCSSRRGNN

```

```

Physcomitrella SS--VVVSAKKGFDDPFDDYGADEEDTMGELMSQGPQGAEDPRPARDPDSESYLDFPA
Oryza          AGVARASAKKNPWLDPFDDGPDDEFDY-RGAFSGG-KQEEDPRPPEDPANPYGFLRFPA
Brachypodium  VWALSASPKNPWLDPFDDGPDDEFDY-TGVYSGG-KQEEDPRPPEDPSNPYGFLRFPM
Populus       -SILTPYAKKNPWIDIFDDGEDLDMEY-GSLFVDG-KQEDTRPVDNPNPNPYGFLKFPK
Arabidopsis   S---VNLKKNPWLDPFDSGEDPDNEY-GSLFADG-KQEEDPRPPDNDPNPYGFLKFPK
Glycine       SVEANCNAKKNPWLDPFDDGEDPEMEY-GSLFADG-KQEEDPRPPDNDPNPYGFLKFPK
                * : . : * * * * : : * : * * * * : * . * : * * *

```

```

Physcomitrella GFMPEVASLGILIRNDVRRCLCMISGGVYENLLFFPVIQLLKNRYPGVRIDVMATPRGKQ
Oryza          GYNPELDSLASKVRRDVRRAQVWSGGVYENLVFFPVVQLLRDRYPGVVDVVASARGKQ
Brachypodium  GYNPELDSLASKVRGDVRRACVWSGGVYENLVFFPVVQLLKDRYPGVLIDVVASARGKQ
Populus       GYNVEVAQLGLKIRGDVRRCCCMISGGVYENLLFFPVIQMLKDRYPGILVDVLASDRGKQ
Arabidopsis   GYTVELASLPLKIRGDVRRCCCVISGGVYENLLFFPVIQMLKDRYPGVQVDILTTERGKQ
Glycine       GYSVEIASLALKVRGDVRRCCCVISGGVYENLLFFPAIQMLKDRYPGVQIDVVASERGKQ
                * : * : . * : * * * * . * : * * * * * : * * * * : * : * * *

```

```

Physcomitrella AYEMNKNVRKAWVHPVDDQFLRPVDFTEVVGKIKGEYYDLLVSTKLAGLGQSIFFWLASV
Oryza          VYEMCKNVR YADVDPDDWPEPAEYTHQLGVLKNRYDILIISTKLAGIGHALFLFMSSA
Brachypodium  VYEMCKNVR YANVDPDDWPEPAEYTHQLGVLKNRYDMLILSTKLAGTGHALFLFMSSA
Populus       CYELNKNVRWANVYDPDG-DPEPAIYTDMI GVLKNRYDVLVSTKLAGLGHASFMFMSSA
Arabidopsis   TYELNKNVRWANVYDPDDWPEPAEYTDMI GLLKGRYDMVLSTKLAGLGHAAFLFMTTA
Glycine       TYELNKNVRWANAYDPDEFPEPAEYTD MVGVLKNRYYDMVLSTKLAGLGHAAFLFMTTA
                ** : * * * * * . : * . . * . : * : * . * * * * : * * * * * :

```

```

Physcomitrella RNKVS YTYPDVNAAGAAKFLDIAIKAPQLELAESGFNMYAEMIEELSQMGNVPKTEVPP
Oryza          RDKVGYVYPNVNSAGAGLFLTEMF RPTTNLADSGYNMYQDMLEWIGRPAKGVPEHPVPP
Brachypodium  REKVG YVYPNVNGAGAGLFLTEMF K PPTTNLSDGGYNMYQEMLEWIGRPGKGVPPQIPPP
Populus       RDKVSYIYPNVNAAGAGLLLTFTEFTPDSANLSEGGYHMYHQMLDWLGRPIYNVPRQPVP
Arabidopsis   RDRVSYIYPNVNSAGAGLMLSETFTAENTNLSELGYSMYTQMEDWLG RPF RSVPRTPLLP
Glycine       RDRVSYIYPNVNAAGAGLLLSETFVPDSQNLSDGGYNMYHQMDWLGLKPFREVP RQPVP
                * : * . * * * : * * * * . : * : * : * : * * * : * : * : *

```

```

Physcomitrella LEVGIGSKVKAYVEAKYREAGVREGEFLVFHGI ECDSSASMTSKGDKDCLLPLSMWAEIA
Oryza          LRVSISKKLRAFVEDKYSRAGVEKGFVVVHGIASDSFANMR SRGDDCLLPLEHWAEIA
Brachypodium  LRVSISKKL R GIVEDKYSRAGVEKGFVVVHGIASDSVANMTSRGDDCLLPLEQWAEIA
Populus       LRVSLSRK LKQYVEAKYRAGAEKGYIVIHGIESDSKASMQSRGDTDSLPLEVWDQIA
Arabidopsis   LRVSISRKVKEVVAAKYRNAGAVTGK FIVIHGIESDSKASMQSGDADSLLSLEKWAKII
Glycine       LRVSISKKLKEVVEAKYKAGAKKGYVVIHGIKSDSKASMQSRGDPDSLPLEVWAEIA
                * . * . : . * : * * * * . * : * * * * . * * * * * * * : . * : *

```

*Physcomitrella* KSTS-----DKVVFVIPNEKWRRKVKEI-CGENAHIVFITTPGQLGALINASKGVVTTNT  
*Oryza* KEISSEDNGLKPLFVIPHQKHREEVEET-VGKDTNILFITTPGQLTCLINDSVGVVATNT  
*Brachypodium* KAISSQGNGLRPLFVMPHQKHREEIEDI-VGRETSYLFITTPGQLTCLINDSAGVVATNT  
*Populus* DAIS----GFKPVFVIPHEKERENVEEIIYNEDIGILFITTPGQ-ATLINDSAGVIATNT  
***Arabidopsis*** **KGVR----GFKPVFVIPHEKERENVEDF-VGDDTSIVFITTPGQLAALINDSAGVIATNT**  
*Glycine* DVIR----DVTPLFVIPHEKERENVEEI-FSEDASIVFITTPGQLAALINDSAGVIATNT  
. :\*:~\*~\* \*~\*~\*~\* . : :\*\*\*\*\* \*\*\* \* ~\*~\*~\*

*Physcomitrella* AALQIAIALKKSTVALFASQEKANLFIIPDYAK-DACAMVASKTGKLCGLDLKAATMAVST  
*Oryza* AAVQLANARDKPCVALFSSKEKARLFLPYLEEKKGCTVVASSETGKLDIDVEAVKKAVKE  
*Brachypodium* AAVQLANARDRPCVALFSSKEKAKLFLPYAEDKKSCTVVASATGKLDADIDIEAVKNAVKE  
*Populus* AAIQLANAREKPSIALFGSEEKGVFVPNAEE-KKCIIVSSKTGKLDIDVGAVKQAMQI  
***Arabidopsis*** **AAIQLANARDKPCIGLFSSEEKGLFVPYAEKSNCVIASKTGKLDADIDIGTVKNAMQV**  
*Glycine* TAVQLANAREKPCIALFCSEEKGNKFVPRAEE-KKCIIVSSKTGKLDIDVEAVKNAVQT  
:~\*~\*~\* \*~\*~\*~\* .: :~\*~\* \*~\*~\*~\*~\* \*~\*~\* . . \*~\*~\*~\* \*\*\*\*\* .:~\*~\* :~\*~\*~\*~\*~\*~\*~\*~\*

*Physcomitrella* IAKEALVAA---  
*Oryza* FKAAPSVALAQT  
*Brachypodium* FEPAPSFALAQK  
*Populus* FDMSLALV----  
***Arabidopsis*** **FEGSLALV----**  
*Glycine* FNLSPALV----  
: ..

**Supplemental Table S6.** Forward and reverse primers used for cloning of bimolecular fluorescence complementation (BiFC) constructs.

Restriction enzyme sites are underlined and translational start codon is marked by bold italic. Frw = forward primer, rev = reverse primer. In order to get proper fusion to C-terminal YFP half, reverse primer lacks a stop codon. RE = restriction enzyme. The cDNA clones were obtained from the Arabidopsis Biological Resource Center (ABRC). All primers were purchased from Sigma Aldrich.

| Construct(s)  | AGI-code    | Primer sequences                                                                                                 | RE-sites      |
|---------------|-------------|------------------------------------------------------------------------------------------------------------------|---------------|
| pSPYCE.NDH-S  | AT4G23890.1 | Frw 5'- CTGCAGAGGATCC <b><i>ATGG</i></b> CGACTTCTTCGATCAC -3'<br>Rev 5'- CTGCAGACCCGGGTGGTGCCTCTTCCTTTT -3'      | BamHI<br>XmaI |
| pSPYNE.NDH-S  | AT4G23890.1 | Frw 5'- CTGCAGAGGATCC <b><i>ATGG</i></b> CGACTTCTTCGATCAC -3'<br>Rev 5'- CTGCAGACCCGGGTGGTGCCTCTTCCTTTT -3'      | BamHI<br>XmaI |
| pSPYCE.PGR5   | At2g05620.1 | Frw 5'- CTGCAGAGGATCC <b><i>ATGG</i></b> GCTGCTGCTTCGATTTTC -3'<br>Rev 5'- CTGCAGACCCGGGAGCAAGGAAACCAAGCCTCT -3' | BamHI<br>XmaI |
| pSPYNE.PGR5   | At2g05620.1 | Frw 5'- CTGCAGAGGATCC <b><i>ATGG</i></b> GCTGCTGCTTCGATTTTC -3'<br>Rev 5'- CTGCAGACCCGGGAGCAAGGAAACCAAGCCTCT -3' | BamHI<br>XmaI |
| pSPYCE.PGRL1A | At4g22890   | Frw 5'- CTGCAGAGGATCC <b><i>ATGG</i></b> GTAGCAAGATGTTGTTTA -3'<br>Rev 5'- CTGCAGACCCGGGAGCTTGGCTTCCTTCTGGC -3'  | BamHI<br>XmaI |
| pSPYNE.PGRL1A | At4g22890   | Frw 5'- CTGCAGAGGATCC <b><i>ATGG</i></b> GTAGCAAGATGTTGTTTA -3'<br>Rev 5'- CTGCAGACCCGGGAGCTTGGCTTCCTTCTGGC -3'  | BamHI<br>XmaI |

## SUPPLEMENTAL REFERENCES

- <sup>(1)</sup>Perez-Ruiz, J.M. and Cejudo, F.J. (2009). A proposed reaction mechanism for rice NADPH thioredoxin reductase C, an enzyme with protein disulfide reductase activity. *FEBS Lett.* 583, 1399-1402.
- <sup>(2)</sup>Richter, A.S., Peter, E., Rothbart, M., Schlicke, H., Toivola, J., Rintamäki, E., and Grimm, B. (2013). Posttranslational Influence of NADPH-Dependent Thioredoxin Reductase C on Enzymes in Tetrapyrrole Synthesis. *Plant Physiol.* 162, 63-73.
- <sup>(3)</sup>Hall, M., Mata-Cabana, A., Akerlund, H.E., Florencio, F.J., Schroder, W.P., Lindahl, M., and Kieselbach, T. (2010). Thioredoxin targets of the plant chloroplast lumen and their implications for plastid function. *Proteomics* 10, 987-1001.
- <sup>(4)</sup>Valerio, C., Costa, A., Marri, L., Issakidis-Bourguet, E., Pupillo, P., Trost, P., and Sparla, F. (2011). Thioredoxin-regulated beta-amylase (BAM1) triggers diurnal starch degradation in guard cells, and in mesophyll cells under osmotic stress. *J. Exp. Bot.* 62, 545-555.
- <sup>(5)</sup>Seung, D., Thalmann, M., Sparla, F., Abou Hachem, M., Lee, S.K., Issakidis-Bourguet, E., Svensson, B., Zeeman, S.C., and Santelia, D. (2013). Arabidopsis thaliana AMY3 Is a Unique Redox- regulated Chloroplastic alpha-Amylase. *J. Biol. Chem.* 288, 33620-33633.
- <sup>(6)</sup>Balmer, Y., Koller, A., del Val, G., Manieri, W., Schurmann, P., and Buchanan, B. (2003). Proteomics gives insight into the regulatory function of chloroplast thioredoxins. *Proc. Natl. Acad. Sci. U. S. A.* 100, 370-375.
- <sup>(7)</sup>Mikkelsen, R., Mutenda, K., Mant, A., Schurmann, P., and Blennow, A. (2005). alpha-Glucan, water dikinase (GWD): A plastidic enzyme with redox-regulated and coordinated catalytic activity and binding affinity. *Proc. Natl. Acad. Sci. U. S. A.* 102, 1785-1790.
- <sup>(8)</sup>Yamaryo, Y., Motohashi, K., Takamiya, K., Hisabori, T., and Ohta, H. (2006). In vitro reconstitution of monogalactosyldiacylglycerol (MGDG) synthase regulation by thioredoxin. *FEBS Lett.* 580, 4086-4090.
- <sup>(9)</sup>Marchand, C., Le Marechal, P., Meyer, Y., and Decottignies, P. (2006). Comparative proteomic approaches for the isolation of proteins interacting with thioredoxin. *Proteomics* 6, 6528-6537.
- <sup>(10)</sup>Skryhan, K., Cuesta-Seijo, J.A., Nielsen, M.M., Marri, L., Mellor, S.B., Glaring, M.A., Jensen, P.E., Palcic, M.M., and Blennow, A. (2015). The Role of Cysteine Residues in Redox Regulation and Protein Stability of Arabidopsis thaliana Starch Synthase 1. *Plos One* 10, e0136997.
- <sup>(11)</sup>Braun, P., Carvunis, A., Charlotiaux, B., Dreze, M., Ecker, J.R., Hill, ... and Arabidopsis Interactome Mapping Co (2011). Evidence for Network Evolution in an Arabidopsis Interactome Map. *Science* 333, 601-607.
